# Supplementary material for: A single amino acid residue controls acyltransferase activity in a polyketide synthase from Toxoplasma gondii
Source: PubMed Central journal article supplement — iScience. 2022 May 23;25(6):104443. doi: 10.1016/j.isci.2022.104443 (PMC9301873; doi:10.1016/j.isci.2022.104443), 2022-05-23
Supplement: mmc1.pdf [file mmc1.pdf]

iScience, Volume 25

## Supplemental information

**A single amino acid residue controls  
acyltransferase activity in a polyketide  
synthase from *Toxoplasma gondii***

**Hannah K. D'Ambrosio, Jack G. Ganley, Aaron M. Keeler, and Emily R. Derbyshire**

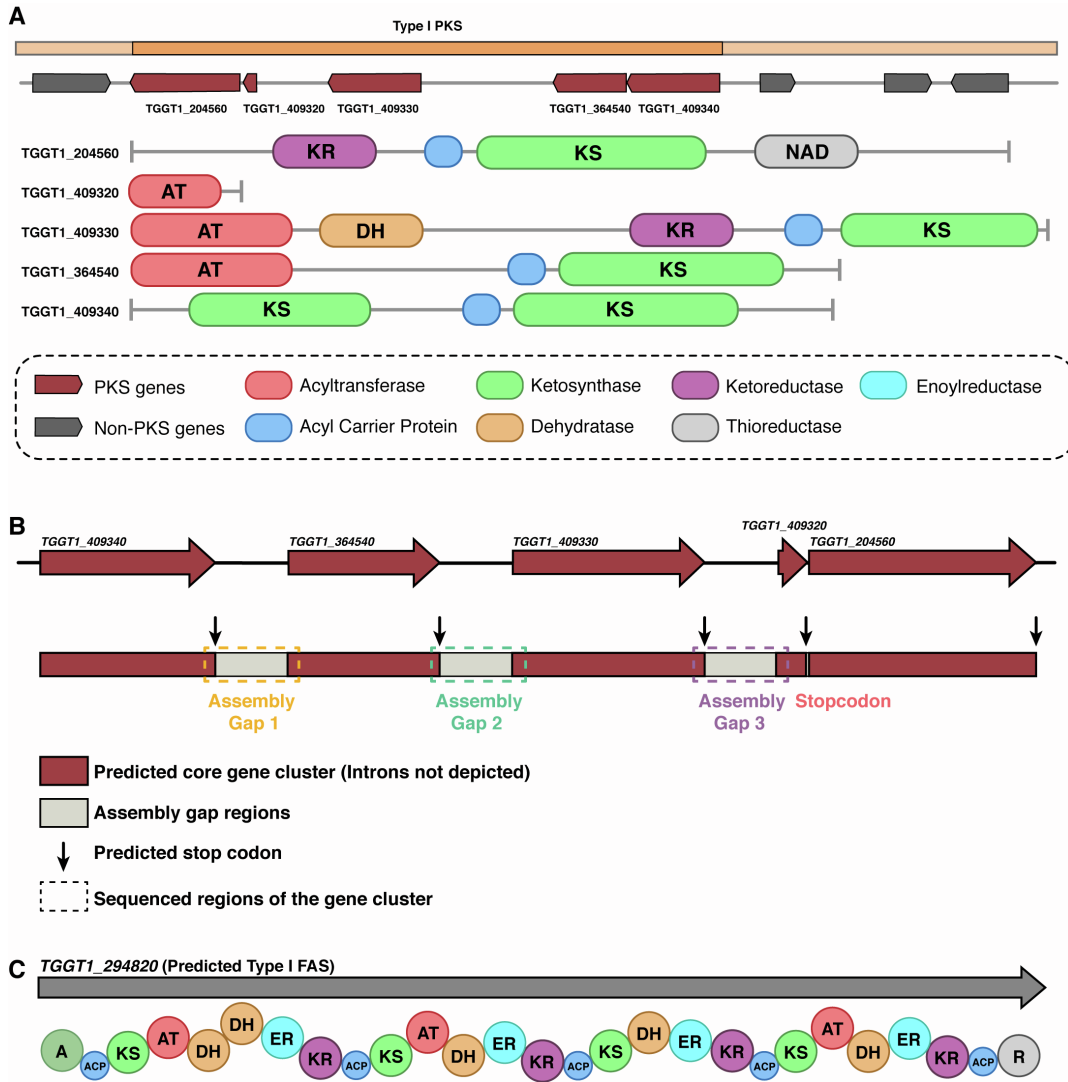

**Figure S1. Bioinformatic Analysis of *PKS2* from *Toxoplasma gondii* (Related to Figure 2).**

**A)** fungiSMASH prediction of biosynthetic gene cluster *PKS2* from the *T. gondii* GT1 genome (GenBank assembly accession: GCA\_000149715.2), depicting both gene arrangement and putative domain architecture. **B)** Depiction of assembly gaps from the *TgPKS2* gene cluster based on fungiSMASH analysis. **C)** Domain architecture of putative Type I Fatty Acid Synthase (FAS) from *T. gondii* GT1 fungiSMASH analysis.

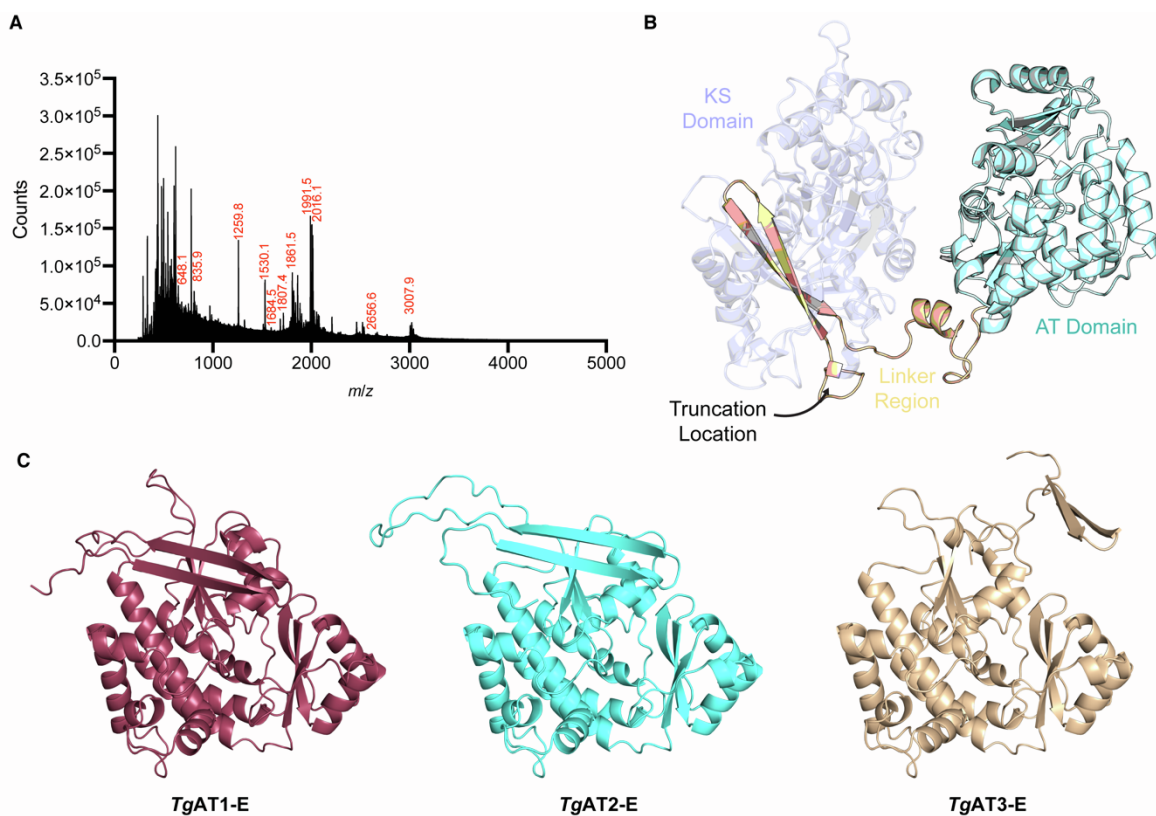

**Figure S2. Confirmation of the Identity of *TgAT2-E* (Related to Figure 3).**

**A)** MALDI-TOF-MS peptide fragmentation pattern confirming that the truncation contained the AT2 domain and C-terminal region of the KS domain. Predicted MALDI-TOF peptides from analysis of KS-AT2 truncation are available in Supplementary Table **S2A**. **B)** AlphaFold2 model of *TgPKS2* KS-AT didomain, indicating the location of the N-terminal cleavage site that produced AT2-E. Protein molecular weights are: AT2 (teal) 34.8 kDa, AT2-E (teal and yellow) 40.6 kDa. **C)** AlphaFold2 models of *TgAT1-E*, *TgAT2-E*, and *TgAT3-E* as labeled.

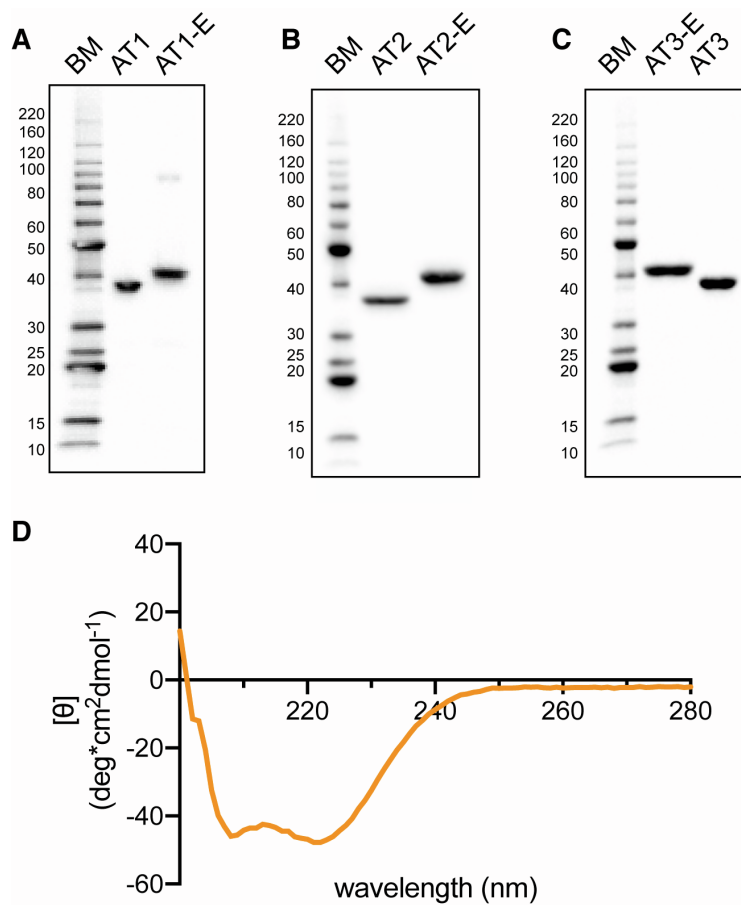

**Figure S3. Western blot analysis of *TgAT* domains and circular dichroism of AT2-E (Related to Figure 3).**

**A)** AT1 (35.8 kDa) and AT1-E (41.4 kDa), **B)** AT2 (34.8 kDa) and AT2-E (40.5 kDa), and **C)** AT3-E (41.5 kDa) and AT3 (35.7 kDa) analyzed by Western blot. All blots contain BenchMark (BM) protein ladder and were analyzed with HRP-conjugated His-Probe. **D)** Circular dichroism of AT2-E. Spectrum indicates an  $\alpha$ -helical protein, consistent with our AlphaFold2 homology models.

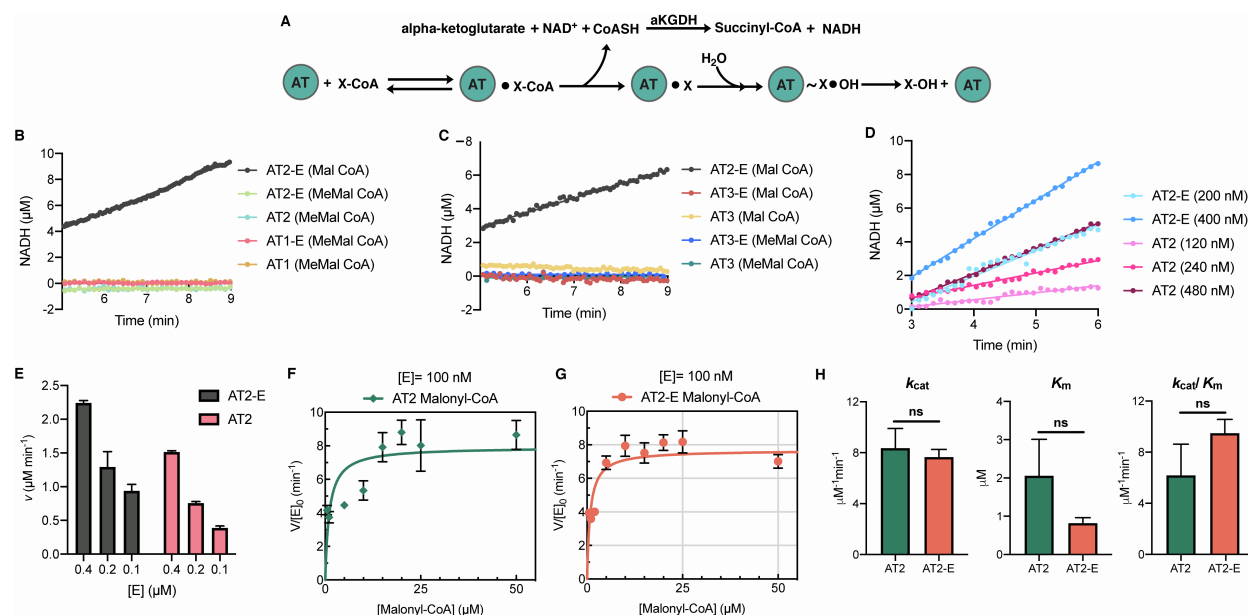

**Figure S4. Characterization of *TgPKS2* AT domain hydrolysis activity (Related to Figure 4).**

**A**) Schematic of the  $\alpha$ -ketoglutarate dehydrogenase ( $\alpha$ KGDH) coupled assay used to assess AT domain hydrolysis of substrates. **B**) Representative rates of methylmalonyl-CoA (150  $\mu$ M) hydrolysis by AT1, AT1-E, AT2, and AT2-E. Rate of malonyl-CoA (150  $\mu$ M) hydrolysis by AT2-E (in dark gray) shown as a reference. **C**) Representative rates of malonyl-CoA and methylmalonyl-CoA (150  $\mu$ M) hydrolysis by AT3 and AT3-E. Rate of malonyl-CoA (150  $\mu$ M) hydrolysis by AT2-E (in dark gray) shown as a reference. **D**) Representative rates of malonyl-CoA hydrolysis for AT2 and AT2-E. **E**) AT2 and AT2-E hydrolysis rates for malonyl-CoA at varying enzyme concentrations (0.4–0.1  $\mu$ M). Michaelis-Menten saturation curves for *TgPKS2* **F**) AT2 and **G**) AT2-E showing 0–50  $\mu$ M malonyl-CoA. Curves with all malonyl-CoA concentrations tested shown in Figure 4C. **H**) Comparison of kinetic parameters calculated from Michaelis–Menten curves of AT2 and AT2-E. Data shown as average  $\pm$  the standard error of the mean of triplicate measurements. Significance was determined using an unpaired t-test; ns, not significant.

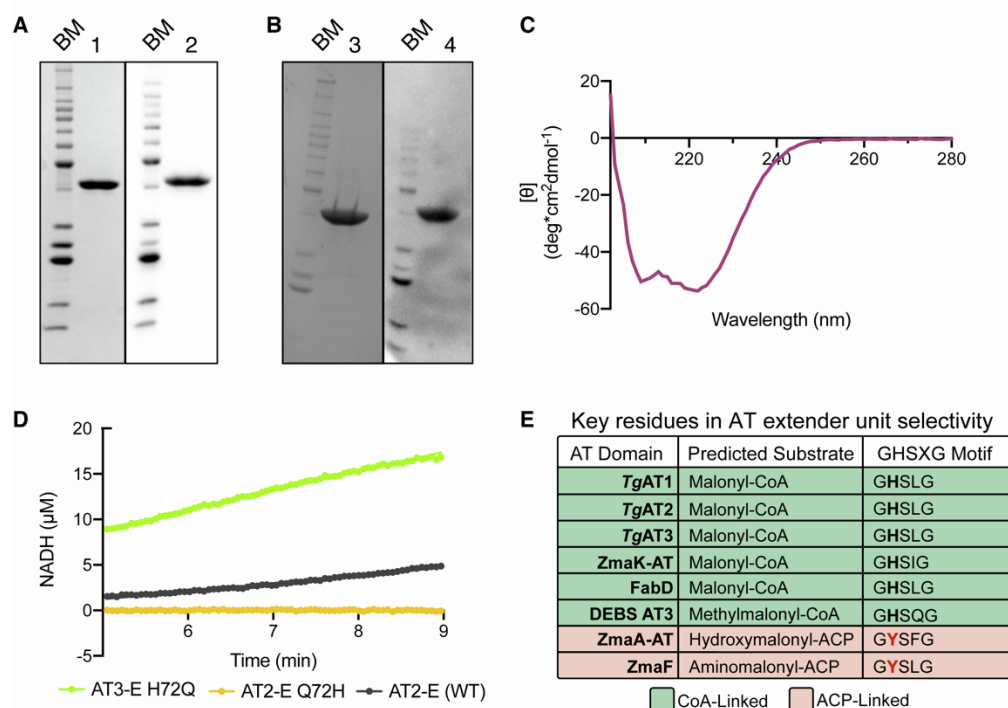

**Figure S5. Analysis of *TgPKS2* AT2-E Q72H and AT3-E H72Q (Related to Figure 5 and 6).**

**A)** Analysis of purified AT2-E-Q72H (40.5 kDa) and **B)** AT3-E-H72Q (40.5 kDa) by SDS-PAGE stained with Coomassie Blue (1 and 3) and by western blot stained with an HRP-conjugated anti-His probe (2 and 4). All gels contain BenchMark (BM) protein ladder. **C)** Circular dichroism of AT2-E-Q72H. Spectrum indicates a folded, highly alpha-helical protein, consistent with our AlphaFold2 homology models. **D)** Representative rates of malonyl-CoA (150  $\mu$ M) hydrolysis by AT2-E-Q72H (200 nM) and AT3-E-H72Q (200 nM). Rate of malonyl-CoA (150  $\mu$ M) hydrolysis by AT2-E WT (100 nM) shown as a reference. **E)** Table displaying consensus sequence for CoA versus ACP substrate selectivity in AT domains. *TgPKS2* domains as well as representative examples from DEBS, FabD, and AT domains involved in zwittericin A biosynthesis have been included. The Y residue (rather than H) indicating ACP-linked substrate specificity is highlighted in red.

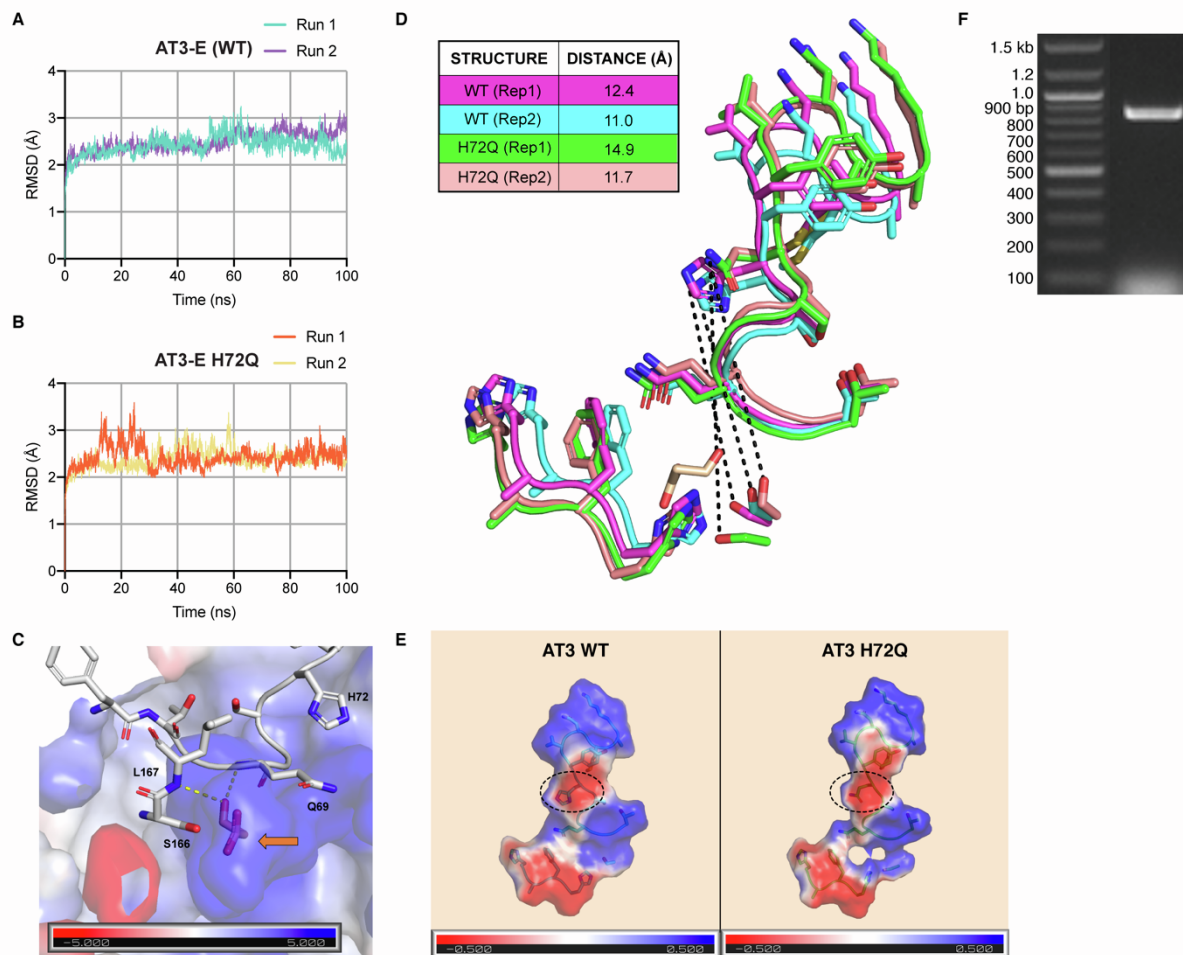

**Figure S6. RMSD measurements of wild-type AT3 and AT3 H72Q from MD simulations and proposed formation of the AT domain oxyanion hole. (Related to Figure 5 and 6).**

RMSD of the C $\alpha$  from all residues during the MD simulations of **A)** WT AT3 and **B)** AT3 H72Q. Each simulation was run in duplicate and RMSDs are shown for each simulation (Run 1 and Run 2). Each simulation was repeated with a different random seed to support convergence and observations. Analysis was completed on homology models generated in AlphaFold2. **C)** Predicted location of the oxyanion hole in AT3 showing the electrostatic potential surface of the catalytic pocket in K<sub>b</sub>T/e (blue = positive potential, red = negative potential). The loop region where residue H72 lies (grey), displaying proposed interactions of the backbone amides with the malonyl-CoA substrate (orange arrow). **D)** Overlaid time-averaged structures for WT AT3 and AT3 H72Q backbone derived from the last 80 ns of MD simulations. Predicted location of malonyl-CoA is also displayed (light tan). Distance from the  $\epsilon$ -nitrogen of His72/Gln72 to the  $\gamma$ -oxygen of the catalytic serine (S166) is shown in table for two runs (Rep1 and Rep2). **E)** Time-averaged structures for WT AT3 and AT3 H72Q backbone overlaid with the surface electrostatic potential of these regions in K<sub>b</sub>T/e (blue = positive potential, red = negative potential). His72/Gln72 residues are circled in a black dotted line. **F)** Visualized PCR amplicon of coding region of *TgPKS2* from *T. gondii* RH cDNA obtained from tachyzoite cultures. Gel components: 1% Agarose with 0.01% ethidium bromide. Lane 1: NEB 100 bp DNA Ladder; Lane 2: *TgPKS2* amplified from *T. gondii* RH cDNA.
